# Supplementary material for: SARS-CoV-2 RNAemia and proteomic biomarker trajectory inform prognostication in COVID-19 patients admitted to intensive care
Source: Research Square preprint supplement (doi:10.21203/rs.3.rs-101592/v1), 2020-11-18
Supplement: Supplementary file 1 [file 05c690800d4434ab050d1f97.pdf]

*Supplementary Information*

**SARS-CoV-2 RNAemia and proteomic biomarker trajectory inform  
prognostication in COVID-19 patients admitted to intensive care**

Clemens Gutmann<sup>1\*</sup>, Kaloyan Takov<sup>1\*</sup>, Sean A. Burnap<sup>1\*</sup>, Bhawana Singh<sup>1\*</sup>, Konstantinos Theofilatos<sup>1</sup>, Ella Reed<sup>1</sup>, Maria Hasman<sup>1</sup>, Adam Nabeebaccus<sup>1,2</sup>, Matthew Fish,<sup>3,4</sup> Mark J.W. McPhail<sup>2,5,6</sup>, Kevin O'Gallagher<sup>1,2</sup>, Lukas E. Schmidt<sup>1</sup>, Christian Cassel<sup>1</sup>, Marieke Rienks<sup>1</sup>, Xiaoke Yin<sup>1</sup>, Georg Auzinger<sup>2</sup>, Salvatore Napoli<sup>5</sup>, Salma F. Mujib<sup>6</sup>, Francesca Trovato<sup>2,5,6</sup>, Barnaby Sanderson<sup>4</sup>, Blair Merrick<sup>7</sup>, Umar Niazi<sup>8</sup>, Mansoor Saqi<sup>8</sup>, Konstantina Dimitrakopoulou<sup>8</sup>, Silke Braun<sup>9</sup>, Romy Kronstein-Wiedemann<sup>10</sup>, Katie J. Doores<sup>3</sup>, Jonathan D. Edgeworth<sup>3,7</sup>, Ajay M. Shah<sup>1</sup>, Stefan R. Bornstein<sup>11,12</sup>, Torsten Tonn<sup>10,13</sup>, Adrian C. Hayday<sup>3,14</sup>, Manu Shankar-Hari<sup>3,4,15</sup>, Manuel Mayr<sup>1,11,15</sup>.

<sup>1</sup> King's College London British Heart Foundation Centre, School of Cardiovascular Medicine and Sciences, London, UK.

<sup>2</sup> King's College Hospital NHS Foundation Trust, London, UK.

<sup>3</sup> Department of Infectious Diseases, School of Immunology and Microbial Sciences, King's College London, London, UK.

<sup>4</sup> Department of Intensive Care Medicine, Guy's and St Thomas' NHS Foundation Trust, London, UK.

<sup>5</sup> Department of Inflammation Biology, School of Immunology and Microbial Sciences, Faculty of Life Sciences and Medicine, King's College London, London, UK.

<sup>6</sup> Institute of Liver Studies, King's College Hospital, London, UK

<sup>7</sup> Clinical Infection and Diagnostics Research group, Department of Infection, Guy's and St Thomas' NHS Foundation Trust, London, UK

<sup>8</sup> NIHR Biomedical Research Centre, Guy's and St Thomas' NHS Foundation Trust and King's College London, London, UK

<sup>9</sup> Medical Clinic I, University Hospital Carl Gustav Carus, Technical University Dresden, Dresden, Germany

<sup>10</sup> Experimental Transfusion Medicine, Faculty of Medicine Carl Gustav Carus, Technical University Dresden, Dresden, Germany

<sup>11</sup> Department of Internal Medicine III, University Hospital Carl Gustav Carus, Technical University Dresden, Dresden, Germany

<sup>12</sup> Department of Diabetes, School of Life Course Science and Medicine, King's College London, London, UK

<sup>13</sup> Institute for Transfusion Medicine, German Red Cross Blood Donation Service North East, Dresden, Germany

<sup>14</sup> The Francis Crick Institute, London, UK

\* Equal first author contribution.

**Running title:** SARS-CoV-2 RNAemia and Proteomics

<sup>15</sup> **To whom correspondence should be addressed:**

Dr. Manu Shankar-Hari; [manu.shankar-hari@kcl.ac.uk](mailto:manu.shankar-hari@kcl.ac.uk) or Prof. Manuel Mayr; King's British Heart Foundation Centre, King's College London, 125 Coldharbour Lane, London, SE59NU UK; Phone: +44(0)2078485446; +44(0)2078485298; [manuel.mayr@kcl.ac.uk](mailto:manuel.mayr@kcl.ac.uk).

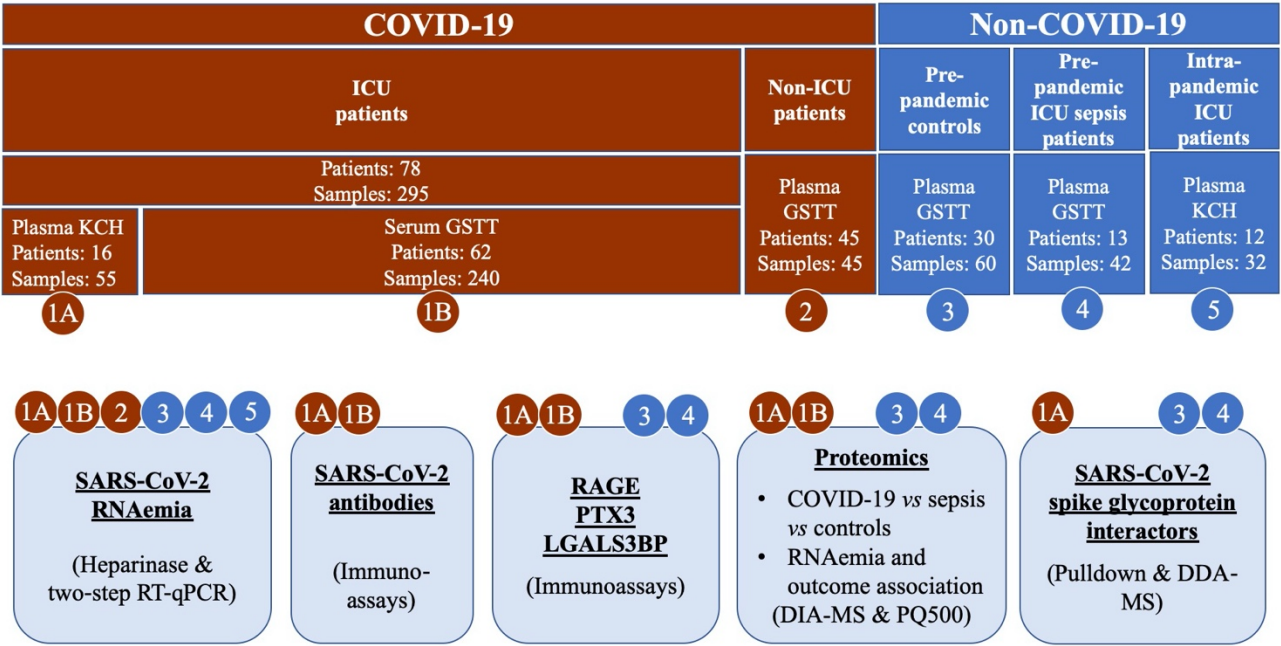

KCH: King’s College Hospital  
GSTT: Guy’s and St Thomas’ NHS Foundation Trust

*Supplementary Fig. 1: Study design.*

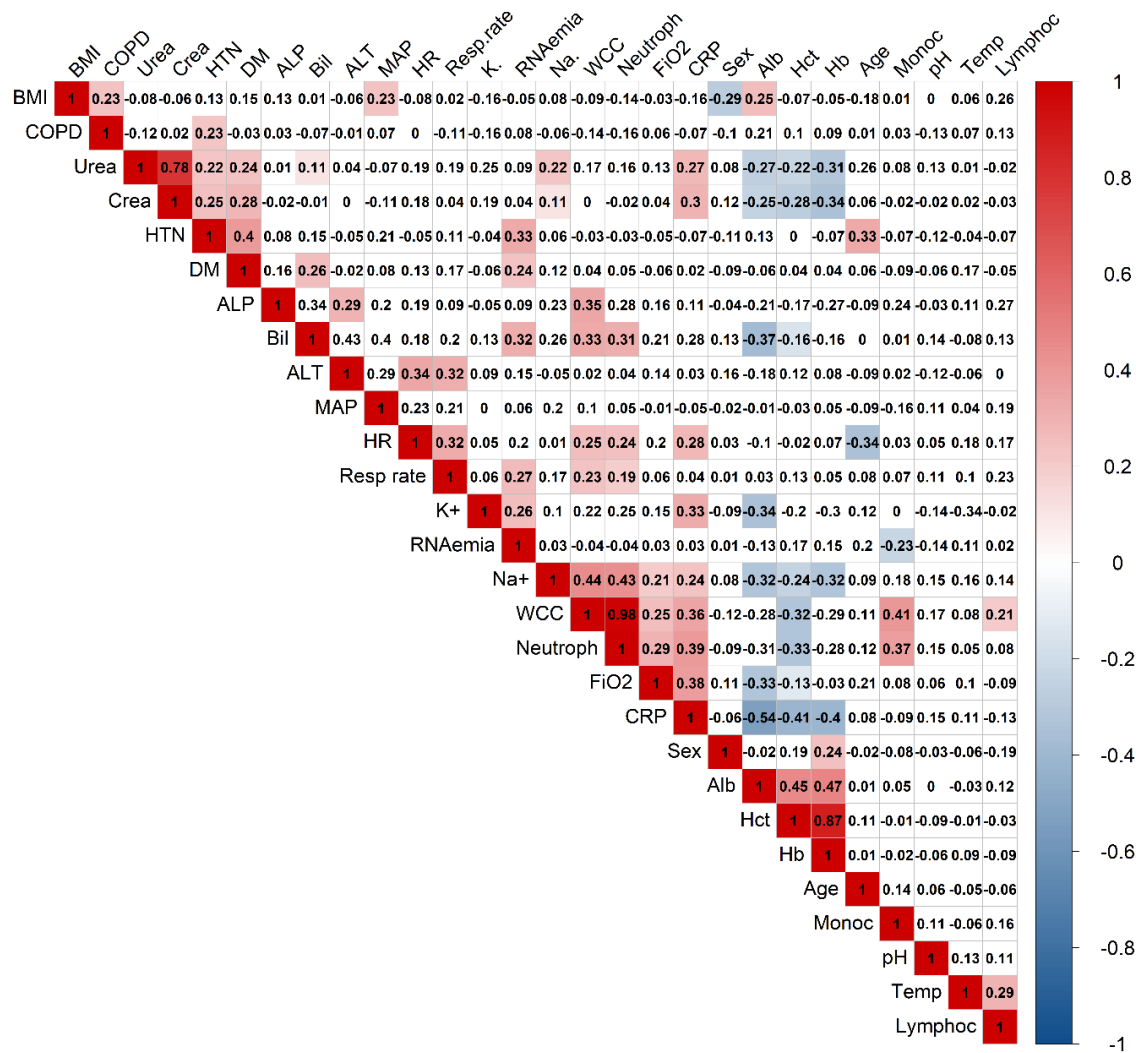

**Supplementary Fig. 2: Pairwise Spearman correlation for continuous variables and point-biserial correlation for binary variables including SARS-CoV-2 RNAemia. Hierarchical clustering analysis and heat-map matrix illustrates positive and negative co-expression and clusters. Three distinct clusters emerge: One comprising of albumin, hematocrit and hemoglobin, second cluster with urea, creatinine, hypertension, and type 2 diabetes and third cluster with sodium, WCC, neutrophils, FiO<sub>2</sub> and CRP. White indicates no significant correlation (P value >0.05). Red indicates positive and blue negative correlation with P value <0.05. Abbreviations: Alb: albumin, ALP: alkaline phosphatase, ALT: alanine aminotransferase, Bil: bilirubin, Crea: creatinine, CRP: C-reactive protein, DM: type 2 diabetes, Hct: hematocrit, Hb: hemoglobin, HR: heart rate, HTN: hypertension, Lymphoc: lymphocytes, MAP: mean arterial pressure, Monoc: monocytes, Neutroph: neutrophils, K: potassium, Resp. rate: respiratory rate, Na.: sodium, Temp: body temperature, WCC: white cell count.**

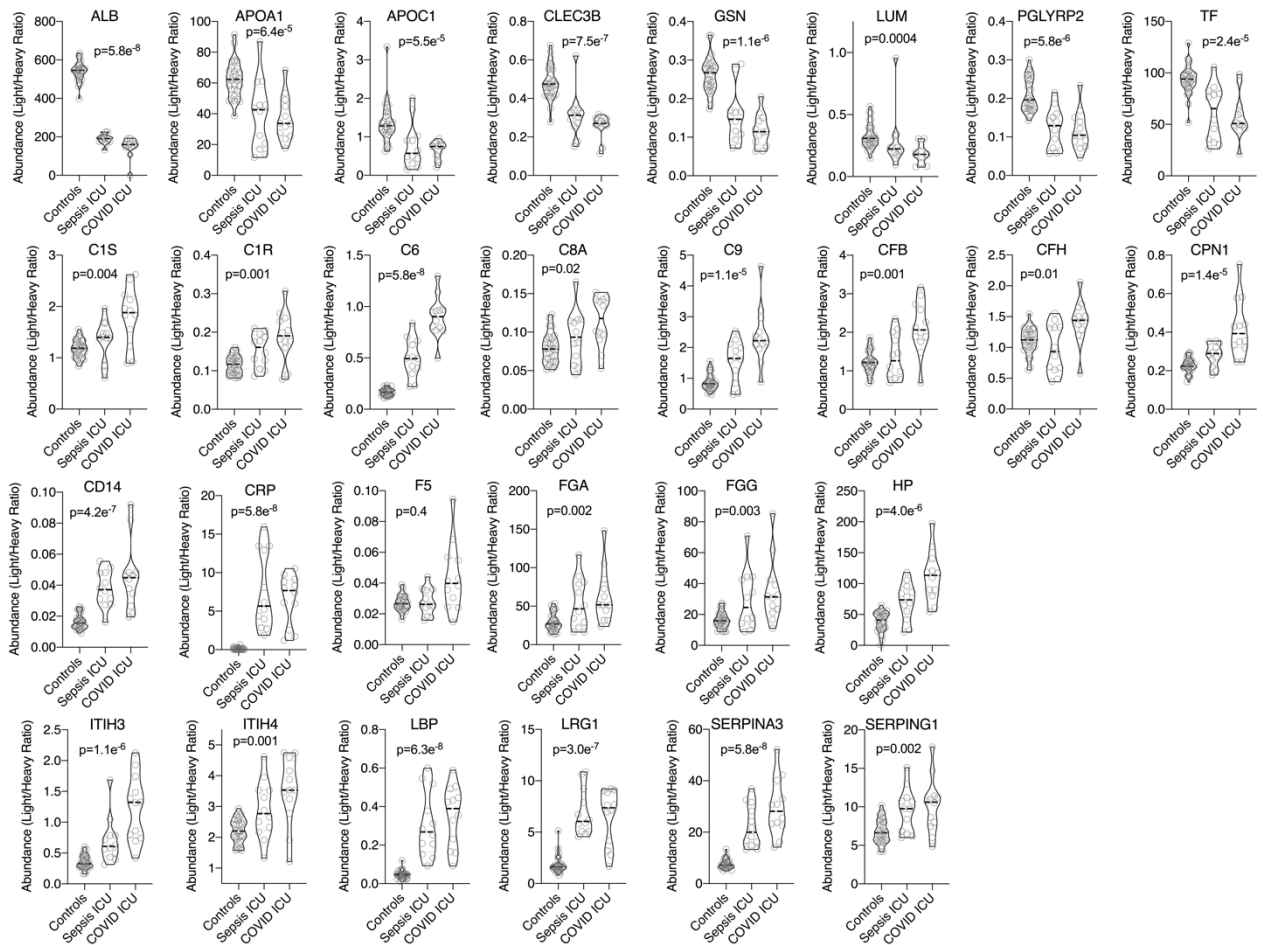

**Supplementary Fig. 3: COVID-19 plasma proteome signature, common to published reports.** Plasma proteome profiling was conducted using a DIA-MS approach with spiked authentic heavy standards. 100 proteins were significantly different in the plasma proteome of COVID-19 ICU patients, when compared to control and sepsis ICU patients, and this panel was cross-referenced against two previously published proteomic studies, exploring circulating protein markers of COVID-19 severity, to generate a panel of 29 common proteins. These 29 common proteins are each individually represented to highlight their variation across disease phenotype. Significance was determined through the Kruskal-Wallis test with Benjamini and Hochberg's FDR correction

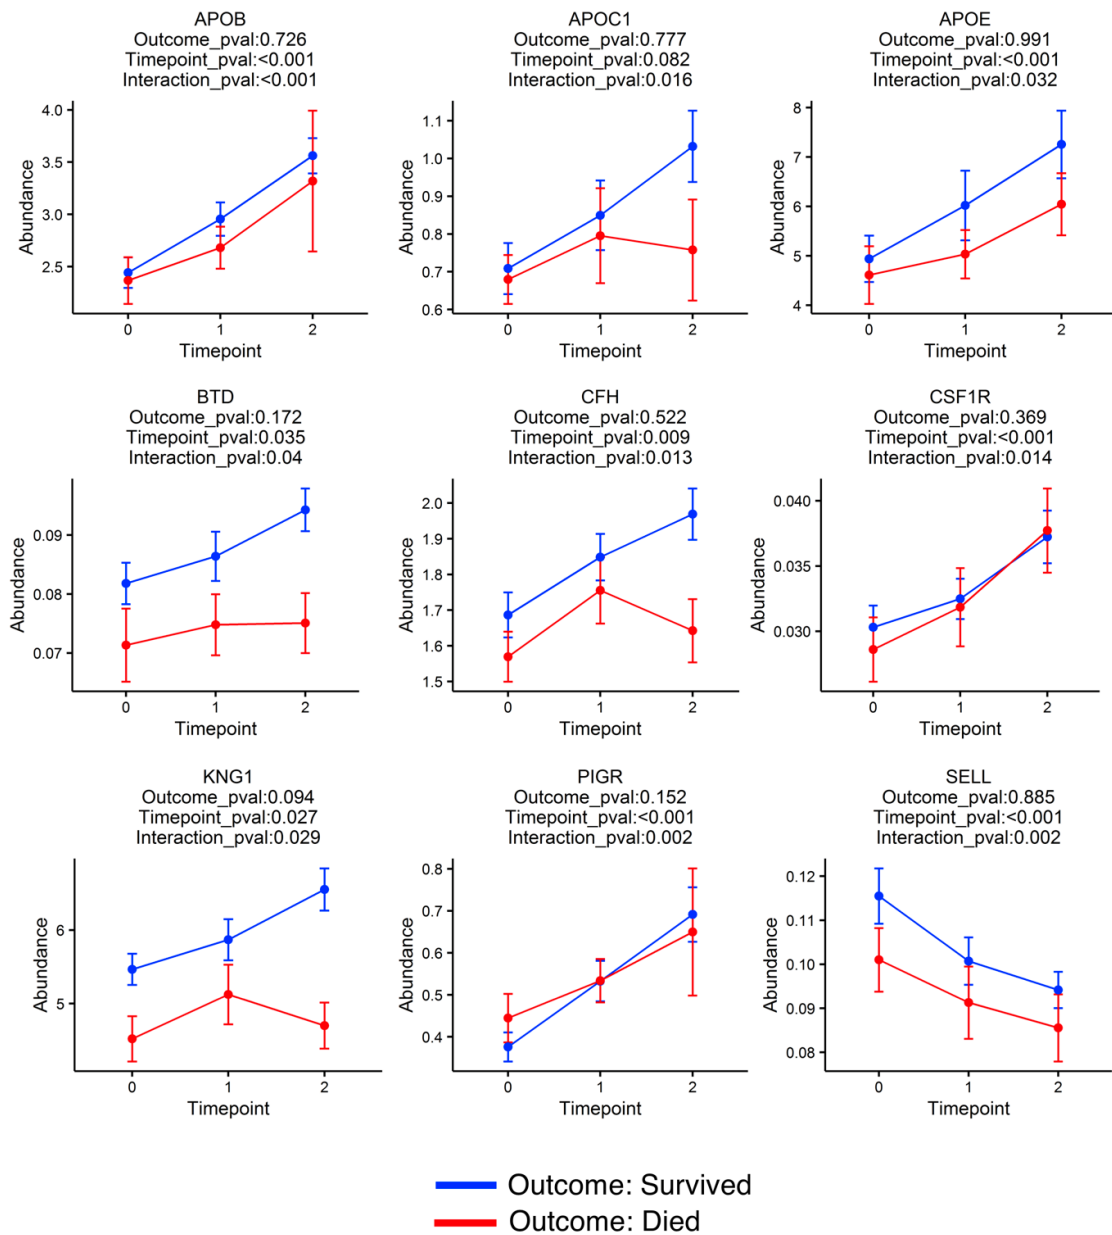

**Supplementary Fig. 4: Comparison of the trajectories of individual proteins in COVID-19 ICU patients.**

Listed are the proteins that show a significant interaction between survival and time of measurement (0 = ICU admission; 1 = first week after ICU admission; 2 = second week after ICU admission). Linear Mixed Models analysis was performed to calculate the P values, correcting for age and sex. Abbreviations: ApoB, apolipoprotein B; ApoC1, apolipoprotein C1; ApoE, apolipoprotein E; BTD, biotinidase; CFH, complement factor H; CSF1R, macrophage colony-stimulating factor 1 receptor; KNG1, kininogen; SELL, L-selectin.

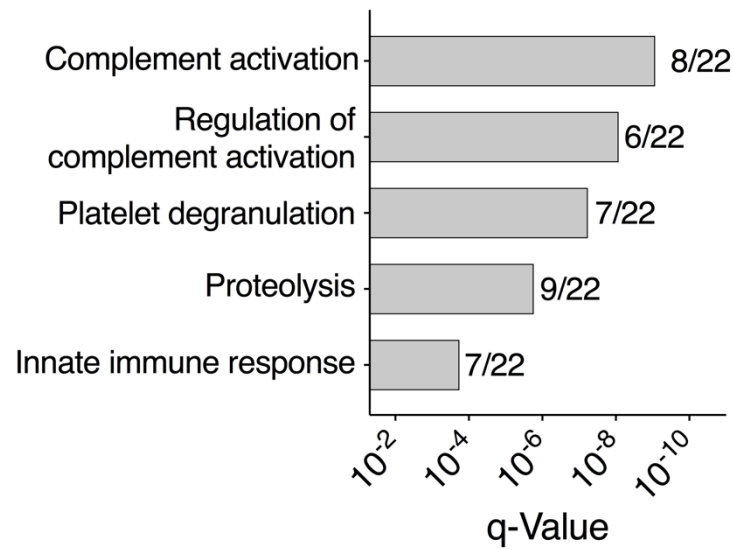

**Supplementary Fig. 5: LGALS3BP enriched functional pathways.** Proteins that correlated with LGALS3BP levels as determined by proteomics with a greater than 0.6 Spearman coefficient were analyzed to determine enriched functional pathways. Gene ontology analysis revealed an enrichment of protein pathways related to the complement system, platelet degranulation, proteolysis and the innate immune response.

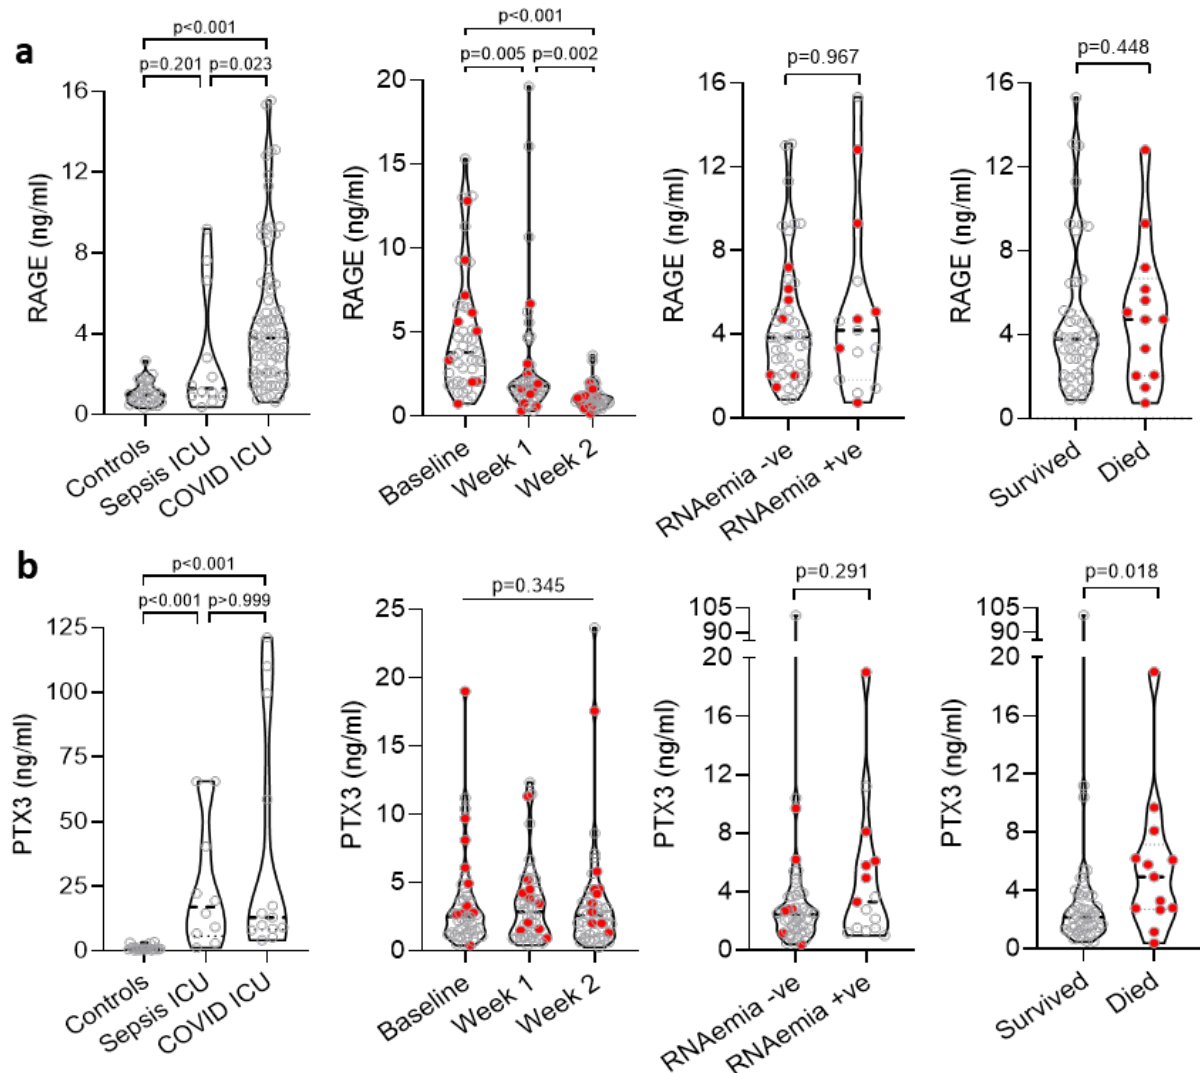

**Supplementary Fig. 6: Existing biomarkers for ARDS and sepsis:** RAGE (a) and PTX3 (b) were measured by ELISA. Comparisons of control (RAGE:  $n = 30$ , PTX3:  $n = 23$ ), sepsis ICU (RAGE:  $n = 12$ , PTX3:  $n = 10$ ) and COVID-19 ICU (RAGE:  $n = 74$ , PTX3:  $n = 13$ ) patients using a Kruskal-Wallis and Dunn's multiple comparisons test. Longitudinal comparisons at baseline, week 1 and week 2 after admission to ICU ( $n = 46$ ). Red dots highlight patients who died, white dots represent patients who survived. Friedman test with Dunn's multiple comparisons were used to determine statistical significance. Comparisons according to RNAemia status ( $n = 46$  negative: "-ve";  $n = 15$  positive: "+ve"). Significance was determined by Mann-Whitney U test. Comparisons according to 28-day mortality ( $n = 13$  died,  $n = 48$  survived). Mann-Whitney U test were used for statistical comparisons.



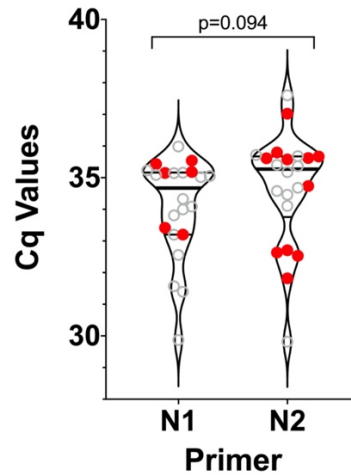

97  
 98 **Supplementary Fig. 7: Abundance of SARS-CoV-2 RNA in plasma or serum.** Cq values of all samples in  
 99 which SARS-CoV-2 RNA was detectable ( $Cq < 40$ ) are shown. Mann-Whitney U test. Red - died, white -  
 100 survived.

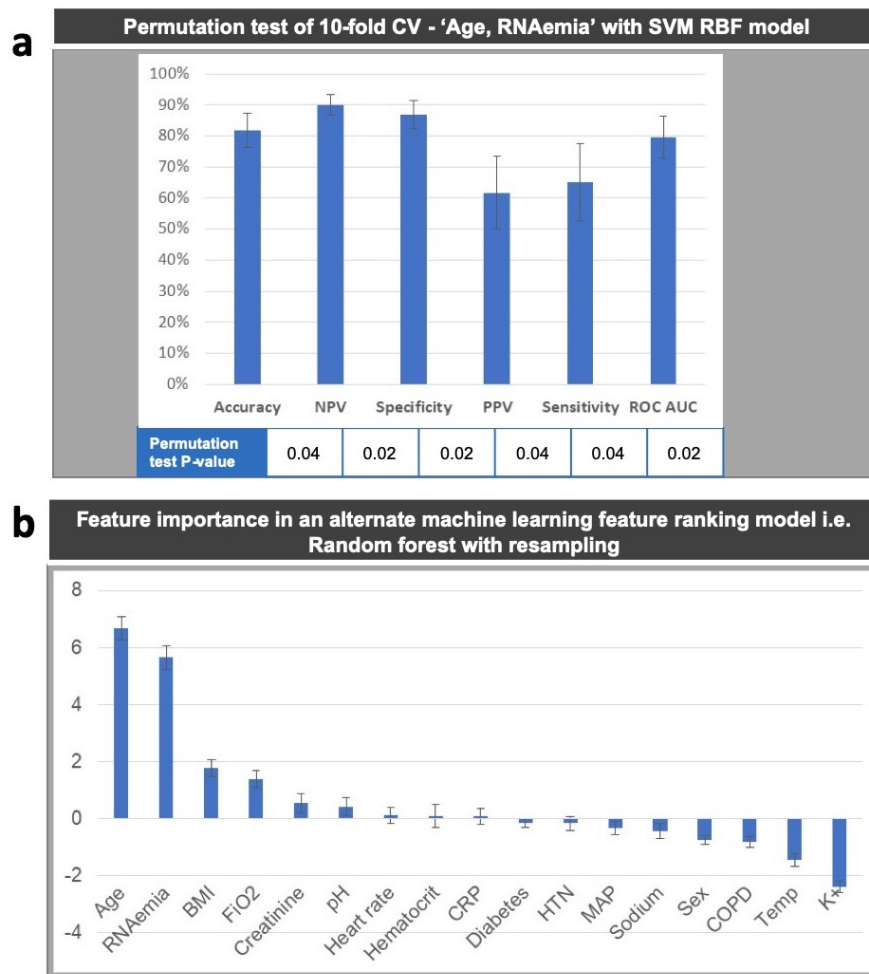

**Supplementary Fig. 8: Technical validation of machine learning model. a, Permutation test of SVM classifier performance:** 10-fold cross-validation (CV) of the best predictor showing mean performance and standard error of mean. 10-fold CV is comparable with leave-one-out metrics shown in Supplementary table 4. Significance test of 10-fold CV performed using permutation test with 50 permutes i.e. repeating the classification procedure after random permuting of the outcome labels. This returned a significant P value i.e.  $<0.05$ , thus indicating that the classifier has found a real class structure (pattern) in the data. Hence, rejecting the null hypothesis that the classifier performance is by chance i.e. input variables and outcome labels are independent. **b, Stability of feature importance under a Random Forest (RF) Model showing mean variable importance** and standard error of mean across 100 resampling cycles of sensitivity analysis. Each resampling cycle takes equal proportions of the two outcome classes from the complete training data. Top 17 (of the 28) features are shown based on mean importance. The features with negative scores make the prediction worse and should be excluded from the model. The technical validation of feature importance stability using this

118 *alternate machine learning method i.e. RF with resampling reinforces the importance of best predictor i.e.*  
119 *'Age, RNAemia' that are ranked among the top 2 most important features. Abbreviations: CRP: C-reactive*  
120 *protein, HTN: Hypertension, MAP: Mean arterial pressure,  $K^+$ : potassium, Temp: Body temperature.*

121 **Supplementary Table 1: Baseline characteristics for COVID-19 ICU patients.**

| COVID-19 Clinical Characteristics     | COVID-19 ICU Patients (n = 78) | COVID-19 'Survivors' (n = 60) | COVID-19 'Non-Survivors' (n = 18) | P value |
|---------------------------------------|--------------------------------|-------------------------------|-----------------------------------|---------|
| SARS-COV-2 RNAemia (%)                | 23.08%                         | 13.33%                        | 55.56%                            | <0.001  |
| Days POS until ICU Admission          | 7.00 (6.25, 10.00)             | 7.00 (6.00, 10.00)            | 9.50 (7.00, 14.00)                | 0.099   |
| Days POS until Death                  | -                              | -                             | 22.00 (19.00, 34.00)              | -       |
| Days from Admission to Death          | -                              | -                             | 13.50 (11.00, 15.50)              | -       |
| <b>Demographics</b>                   |                                |                               |                                   |         |
| Age (Years)                           | 54.00 (46.25, 64.01)           | 52.01 (44.00, 61.01)          | 65.01 (57.51, 77.04)              | <0.001  |
| Sex (% Male)                          | 71.79%                         | 70.00%                        | 77.78%                            | 0.766   |
| BMI (kg/m <sup>2</sup> )              | 28.05 (24.71, 34.28)           | 28.10 (24.80, 34.90)          | 25.87 (24.55, 31.46)              | 0.252   |
| <b>Comorbidities</b>                  |                                |                               |                                   |         |
| COPD (%)                              | 16.67%                         | 15.00%                        | 22.22%                            | 0.483   |
| Diabetes (%)                          | 25.64%                         | 25.00%                        | 27.78%                            | 0.769   |
| Hypertension (%)                      | 37.18%                         | 33.33%                        | 50.00%                            | 0.267   |
| <b>Acute Care Parameters</b>          |                                |                               |                                   |         |
| APACHE II Score                       | 15.00 (11.00, 19.00)           | 14.00 (11.00, 18.00)          | 17.00 (13.75, 20.50)              | 0.126   |
| SOFA Score                            | 6.00 (4.00, 8.00)              | 6.00 (4.00, 7.00)             | 8.00 (4.00, 9.00)                 | 0.171   |
| FiO <sub>2</sub> (Fraction of 1)      | 0.50 (0.35, 0.60)              | 0.47 (0.35, 0.56)             | 0.52 (0.50, 0.60)                 | 0.113   |
| Heart rate (bpm)                      | 96.01 (63.27, 112.49)          | 96.50 (63.01, 114.99)         | 93.00 (86.00, 101.51)             | 0.767   |
| MAP (mmHg)                            | 65.51 (61.09, 79.75)           | 65.17 (61.09, 80.75)          | 65.51 (61.33, 70.50)              | 0.749   |
| Respiratory rate (bpm)                | 22.00 (16.25, 28.07)           | 20.7 (16.00, 28.00)           | 23.83 (22.00, 28.77)              | 0.138   |
| Temperature (°C)                      | 38.19 (36.85, 39.07)           | 38.44 (36.95, 39.02)          | 37.94 (36.85, 38.97)              | 0.656   |
| <b>Blood Biochemistry</b>             |                                |                               |                                   |         |
| Albumin (g/L)                         | 30.00 (27.01, 33.00)           | 30.00 (27.01, 33.00)          | 29.50 (26.26, 30.28)              | 0.167   |
| ALP (U/L)                             | 64.49 (48.99, 94.49)           | 64.49 (48.74, 97.24)          | 61.00 (50.25, 80.75)              | 0.981   |
| ALT (IU/L)                            | 36.01 (27.02, 51.92)           | 35.49 (25.02, 47.31)          | 41.68 (30.47, 55.86)              | 0.171   |
| Bilirubin (µmol/L)                    | 11.49 (8.00, 25.91)            | 10.99 (8.00, 21.89)           | 18.02 (8.00, 34.75)               | 0.313   |
| Creatinine (µmol/L)                   | 94.49 (72.02, 170.03)          | 89.38 (69.77, 174.54)         | 124.03 (91.24, 153.75)            | 0.265   |
| C-reactive protein (mg/L)             | 226.21 (143.02, 328.21)        | 237.71 (103.56, 336.98)       | 215.68 (167.97, 299.57)           | 0.981   |
| Hemoglobin (g/L)                      | 115.63 (103.26, 123.75)        | 114.50 (100.51, 121.25)       | 120.00 (107.76, 125.74)           | 0.224   |
| pH                                    | 7.36 (7.31, 7.41)              | 7.36 (7.31, 7.42)             | 7.32 (7.31, 7.38)                 | 0.233   |
| Potassium (mmol/L)                    | 4.50 (4.30, 4.80)              | 4.50 (4.30, 4.80)             | 4.35 (4.12, 4.85)                 | 0.668   |
| Sodium (mmol/L)                       | 140.00 (137.00, 143.99)        | 140.00 (137.00, 143.24)       | 140.50 (137.25, 144.99)           | 0.426   |
| Urea (mmol/L)                         | 7.11 (5.01, 12.37)             | 6.55 (4.87, 10.77)            | 10.70 (6.36, 15.27)               | 0.039   |
| <b>Cellular Evaluation</b>            |                                |                               |                                   |         |
| Hematocrit (%)                        | 37.20 (30.26, 39.82)           | 36.00 (29.71, 39.30)          | 39.30 (35.25, 41.10)              | 0.069   |
| Lymphocytes (10 <sup>9</sup> /l)      | 0.86 (0.63, 1.20)              | 0.88 (0.69, 1.20)             | 0.83 (0.45, 1.09)                 | 0.498   |
| Monocytes (10 <sup>9</sup> /l)        | 0.40 (0.25, 0.50)              | 0.36 (0.28, 0.51)             | 0.40 (0.24, 0.48)                 | 0.743   |
| Neutrophils (10 <sup>9</sup> /l)      | 7.38 (4.90, 9.68)              | 7.27 (4.90, 9.53)             | 7.50 (4.29, 9.83)                 | 0.934   |
| White cell count (10 <sup>9</sup> /l) | 8.50 (6.53, 11.28)             | 8.50 (6.60, 11.00)            | 8.53 (5.95, 12.12)                | 0.962   |

Continuous variables are presented as median (25<sup>th</sup> and 75<sup>th</sup> percentile). P value computed for survivors vs non-survivors using Mann-Whitney test for continuous variables and Fisher exact test for binary variables. SARS-CoV-2 RNAemia: positive blood test within first six days of admission to ICU; Abbreviations: Days POS: days post onset of symptoms; APACHE II score: acute physiology and chronic health evaluation II score; SOFA score: the sequential organ failure assessment score; MAP: mean arterial pressure; ALP: alkaline phosphatase, ALT: alanine aminotransferase.

148 **Supplementary Table 2: Baseline characteristics for non-ICU, hospitalized COVID-19 patients.**

| Clinical Characteristics                        | Non-ICU COVID-19 patients<br>(n = 45) |
|-------------------------------------------------|---------------------------------------|
| SARS-CoV-2 RNAemia (%)                          | 4.44%                                 |
| Non-Survivors 28 days after hospitalization (%) | 11.11%                                |
| <b>Demographics</b>                             |                                       |
| Age (years)                                     | 60.82 (45.95, 71.58)                  |
| Sex (% Male)                                    | 66.66%                                |
| BMI (kg/m <sup>2</sup> )                        | 26.32 (21.32, 31.50)                  |
| <b>Comorbidities</b>                            |                                       |
| COPD – no. (%)                                  | 8 (17.77%)                            |
| Diabetes – no. (%)                              | 12 (26.66%)                           |
| Hypertension – no. (%)                          | 21 (46.66%)                           |
| <b>Acute Care Parameters</b>                    |                                       |
| FiO <sub>2</sub> (Fraction of I)                | 0.21 (0.21, 0.28)                     |
| Heart rate (bpm)                                | 103 (87, 118)                         |
| Temperature (°C)                                | 37.6 (36.85, 38.3)                    |
| <b>Blood Biochemistry</b>                       |                                       |
| Albumin (g/L)                                   | 37.00 (32.75, 40.00)                  |
| ALT (IU/L)                                      | 30.50 (16.50, 52.00)                  |
| Bilirubin (μmol/L)                              | 8 (4.5, 11)                           |
| Creatinine (μmol/L)                             | 71 (62, 89)                           |
| C-reactive protein (mg/L)                       | 58 (29, 138)                          |
| <b>Cellular Evaluation</b>                      |                                       |
| Lymphocytes (10 <sup>9</sup> /l)                | 1.05 (0.63, 1.30)                     |
| Monocytes (10 <sup>9</sup> /l)                  | 0.50 (0.40, 0.70)                     |
| Neutrophils (10 <sup>9</sup> /l)                | 5.15 (3.33, 7.00)                     |
| Platelets (10 <sup>9</sup> /l)                  | 261.5 (192.0, 334.5)                  |
| White cell count (10 <sup>9</sup> /l)           | 6.90 (4.65, 9.28)                     |

149

150 *Continuous variables are presented as median (25<sup>th</sup> and 75<sup>th</sup> percentile). Abbreviations: ALT: alanine*

151 *aminotransferase.*

152

153

154

| COVID-19 Clinical Characteristics     | COVID-19 ICU Patients (n = 78) | RNAemia Negative (n = 60) | RNAemia Positive (n = 18) | P value |
|---------------------------------------|--------------------------------|---------------------------|---------------------------|---------|
| Non-Survivors (%)                     | 23.08%                         | 13.33%                    | 55.56%                    | <0.001  |
| Days POS until ICU Admission          | 7.00 (6.25, 10.00)             | 7.00 (6.00, 10.00)        | 7.00 (6.25, 10.00)        | 0.690   |
| Days POS until Death                  | 22.00 (19.00, 34.00)           | 26.00 (19.00, 36.50)      | 21.50 (18.50, 25.25)      | 0.434   |
| Days from Admission to Death          | 13.50 (11.00, 15.50)           | 13.00 (12.00, 17.00)      | 14.00 (11.00, 15.00)      | 0.641   |
| <b>Demographics</b>                   |                                |                           |                           |         |
| Age (Years)                           | 54.00 (46.25, 64.01)           | 53.01 (45.75, 62.26)      | 61.01 (48.25, 66.01)      | 0.107   |
| Sex (% Male)                          | 71.79%                         | 71.67%                    | 72.22%                    | 1.000   |
| BMI (kg/m <sup>2</sup> )              | 28.05 (24.71, 34.28)           | 28.05 (24.65, 34.68)      | 29.38 (24.93, 31.70)      | 0.845   |
| <b>Comorbidities</b>                  |                                |                           |                           |         |
| COPD (%)                              | 16.67%                         | 15.00%                    | 22.22%                    | 0.483   |
| Diabetes (%)                          | 25.64%                         | 20.00%                    | 44.44%                    | 0.062   |
| Hypertension (%)                      | 37.18%                         | 28.33%                    | 66.67%                    | 0.005   |
| <b>Acute Care Parameters</b>          |                                |                           |                           |         |
| APACHE II Score                       | 15.00 (11.00, 19.00)           | 14.50 (11.00, 17.75)      | 17.00 (11.75, 23.00)      | 0.114   |
| SOFA Score                            | 6.00 (4.00, 8.00)              | 5.00 (4.00, 8.00)         | 7.00 (4.00, 9.00)         | 0.363   |
| FiO <sub>2</sub> (Fraction of 1)      | 0.50 (0.35, 0.60)              | 0.50 (0.35, 0.60)         | 0.50 (0.46, 0.59)         | 0.306   |
| Heart rate (bpm)                      | 96.01 (63.27, 112.49)          | 93.50 (62.76, 114.25)     | 99.50 (92.50, 108.25)     | 0.140   |
| MAP (mmHg)                            | 65.51 (61.09, 79.75)           | 63.50 (59.08, 80.08)      | 67.67 (65.34, 70.76)      | 0.057   |
| Respiratory rate                      | 22.00 (16.25, 28.07)           | 20.75 (13.80, 28.00)      | 26.00 (22.00, 30.00)      | 0.023   |
| Temperature (°C)                      | 38.19 (36.85, 39.07)           | 38.29 (36.05, 39.09)      | 38.19 (37.75, 38.99)      | 0.622   |
| <b>Blood Biochemistry</b>             |                                |                           |                           |         |
| Albumin (g/L)                         | 30.00 (27.01, 33.00)           | 30.50 (27.01, 33.00)      | 29.50 (27.01, 30.00)      | 0.178   |
| ALP (U/L)                             | 64.49 (48.99, 94.49)           | 63.49 (48.99, 94.98)      | 65.51 (49.24, 88.49)      | 0.896   |
| ALT (IU/L)                            | 36.01 (27.02, 51.92)           | 33.00 (25.02, 43.31)      | 51.62 (41.02, 60.75)      | 0.003   |
| Bilirubin (μmol/L)                    | 11.49 (8.00, 25.91)            | 10.99 (8.00, 17.27)       | 30.47 (10.14, 44.17)      | 0.011   |
| Creatinine (μmol/L)                   | 94.49 (72.02, 170.03)          | 93.49 (71.53, 166.00)     | 100.51 (81.03, 168.03)    | 0.817   |
| C-reactive protein (mg/L)             | 226.21 (143.02, 328.21)        | 237.71 (138.78, 336.88)   | 189.52 (153.54, 320.12)   | 0.910   |
| Hemoglobin (g/L)                      | 115.63 (103.26, 123.75)        | 113.85 (100.51, 121.25)   | 119.50 (114.00, 126.00)   | 0.104   |
| pH                                    | 7.36 (7.31, 7.41)              | 7.36 (7.31, 7.42)         | 7.32 (7.30, 7.38)         | 0.217   |
| Potassium (mmol/L)                    | 4.50 (4.30, 4.80)              | 4.40 (4.30, 4.72)         | 4.65 (4.27, 4.98)         | 0.118   |
| Sodium (mmol/L)                       | 140.00 (137.00, 143.99)        | 140.00 (137.00, 143.99)   | 139.50 (137.25, 144.49)   | 0.794   |
| Urea (mmol/L)                         | 7.11 (5.01, 12.37)             | 6.55 (4.80, 11.77)        | 8.42 (6.63, 14.55)        | 0.141   |
| <b>Cellular Evaluation</b>            |                                |                           |                           |         |
| Hematocrit (%)                        | 37.20 (30.26, 39.82)           | 36.00 (29.63, 39.30)      | 38.55 (35.85, 40.57)      | 0.078   |
| Lymphocytes (10 <sup>9</sup> /l)      | 0.86 (0.63, 1.20)              | 0.80 (0.64, 1.19)         | 0.88 (0.62, 1.23)         | 0.784   |
| Monocytes (10 <sup>9</sup> /l)        | 0.40 (0.25, 0.50)              | 0.40 (0.30, 0.59)         | 0.30 (0.21, 0.40)         | 0.064   |
| Neutrophils (10 <sup>9</sup> /l)      | 7.38 (4.90, 9.68)              | 7.34 (4.90, 9.53)         | 7.69 (4.16, 10.27)        | 0.896   |
| White cell count (10 <sup>9</sup> /l) | 8.50 (6.53, 11.28)             | 8.50 (6.58, 11.00)        | 9.40 (5.36, 12.16)        | 0.995   |

156 Continuous variables are presented as median (25<sup>th</sup> and 75<sup>th</sup> percentile). P value computed for SARS-CoV-2  
157 RNAemia positive vs negative patients within first six days of admission to ICU using Mann-Whitney U test  
158 for continuous variables and Fisher exact test for binary variables. Abbreviations: Days POS: days post onset  
159 of symptoms; APACHE II score: acute physiology and chronic health evaluation score; SOFA score: the  
160 sequential organ failure assessment score; MAP: mean arterial pressure; ALP: alkaline phosphatase, ALT:  
161 alanine aminotransferase.



162 **Supplementary Table 4: Baseline characteristics for non-COVID-19 ICU patients.**

| Clinical Characteristics         | Pre-pandemic<br>non-COVID-19<br>ICU sepsis patients<br>(n = 13) | Intra-pandemic<br>non-COVID-19<br>ICU patients<br>(n = 12) |
|----------------------------------|-----------------------------------------------------------------|------------------------------------------------------------|
| SARS-CoV-2 RNAemia (%)           | 0%                                                              | 0%                                                         |
| Non-Survivors at day 28 (%)      | 0%                                                              | 41.66%                                                     |
| <b>Demographics</b>              |                                                                 |                                                            |
| Age (Years)                      | 64 (38, 73)                                                     | 70 (59.25, 78)                                             |
| Sex – % Male                     | 53.85%                                                          | 58.33%                                                     |
| BMI (kg/m <sup>2</sup> )         | 26.12 (23.88, 27.55)                                            | 30.30 (26.77, 34.09)                                       |
| <b>Comorbidities</b>             |                                                                 |                                                            |
| COPD (%)                         | 3 (23.08%)                                                      | 3 (25%)                                                    |
| Diabetes (%)                     | 2 (15.39%)                                                      | 6 (50%)                                                    |
| Hypertension (%)                 | 7 (53.85%)                                                      | 5 (41.66%)                                                 |
| <b>Acute Care Parameters</b>     |                                                                 |                                                            |
| APACHE II score                  | 16 (15, 21)                                                     | -                                                          |
| FiO <sub>2</sub> (Fraction of 1) | 0.4 (0.27, 0.65)                                                | 0.28 (0.25, 0.31)                                          |
| Heart rate (bpm)                 | 115 (69, 136)                                                   | 80 (78, 93)                                                |
| MAP (mmHg)                       | 65.67 (60, 99.33)                                               | 81.5 (72, 85.75)                                           |
| Respiratory rate                 | 23.50 (19.00, 28.75)                                            | 20.5 (19.75, 25.25)                                        |
| SOFA score                       | -                                                               | 3.5 (1.75, 6.25)                                           |
| Temperature (°C)                 | 37.7 (35.8, 38.5)                                               | 36.9 (36.8, 37.0)                                          |

163

164 *Continuous variables are presented as median (25<sup>th</sup> and 75<sup>th</sup> percentile). Abbreviations: APACHE II score:*

165 *acute physiology and chronic health evaluation II score, MAP: mean arterial pressure. SOFA score:*

166 *sequential organ failure assessment score. Intra-pandemic, non-COVID-19 ICU patients repeatedly tested*

167 *negative for nasopharyngeal SARS-CoV-2 by RT-qPCR. SARS-CoV-2 RNAemia was assessed in COVID-19-*

168 *negative patients to determine assay specificity.*

169 **Supplementary Table 5: Baseline characteristics for control patients before elective cardiac surgery.**

| Clinical Characteristics | Non-COVID-19, non-ICU controls<br>(n = 30) |
|--------------------------|--------------------------------------------|
| SARS-CoV-2 RNAemia (%)   | 0%                                         |
| <b>Demographics</b>      |                                            |
| Age (Years)              | 70 (64.00, 74.75)                          |
| Sex (% Male)             | 73.33%                                     |
| BMI (kg/m <sup>2</sup> ) | 28.22 (25.02, 30.77)                       |
| <b>Comorbidities</b>     |                                            |
| COPD (%)                 | 6 (20%)                                    |
| Diabetes (%)             | 7 (23.33%)                                 |
| Hypertension (%)         | 17 (56.66%)                                |

170

171 *Continuous variables are presented as median (25<sup>th</sup> and 75<sup>th</sup> percentile). SARS-CoV-2 RNAemia was assessed*

172 *in COVID-19-negative patients to determine assay specificity.*

173

174 **Supplementary Table 6: External validation data based on proximity-extension assays.**

| Protein     | Log2 Fold Change<br>Non-Survivors vs Survivors | Average<br>Relative Quantity | P value  | FDR               |
|-------------|------------------------------------------------|------------------------------|----------|-------------------|
| <b>PTX3</b> | 0.89784                                        | 5.79471                      | <0.00001 | <b>&lt;0.0001</b> |
| IL17C       | 0.96308                                        | 2.67565                      | <0.00001 | 0.0001            |
| IL6         | 1.42029                                        | 5.81313                      | <0.00001 | 0.0003            |
| <b>PROC</b> | -0.37773                                       | 3.21418                      | <0.00001 | <b>0.0005</b>     |
| IL1RN       | 0.86502                                        | 2.69615                      | 0.00001  | 0.001             |
| CX3CL1      | 0.56603                                        | 4.56926                      | 0.00003  | 0.002             |
| IL1RL1      | 0.81686                                        | 2.75287                      | 0.00004  | 0.003             |
| CCL2        | 0.60728                                        | 6.13895                      | 0.00007  | 0.003             |
| IL15        | 0.47248                                        | 3.49095                      | 0.0001   | 0.004             |
| CXCL8       | 0.7077                                         | 3.27201                      | 0.00014  | 0.004             |
| CCL20       | 0.92856                                        | 5.23471                      | 0.00032  | 0.007             |
| IL4R        | 0.60584                                        | 3.31738                      | 0.00054  | 0.009             |
| IL19        | 0.67502                                        | 2.16278                      | 0.00061  | 0.010             |
| CXCL13      | 0.58454                                        | 3.52346                      | 0.00094  | 0.013             |
| CRLF1       | 0.31295                                        | 1.68468                      | 0.00188  | 0.019             |
| <b>F7</b>   | -0.29250                                       | 3.56072                      | 0.002    | <b>0.021</b>      |
| CXCL10      | 0.72777                                        | 7.41412                      | 0.002    | 0.021             |
| CCL7        | 0.76166                                        | 4.81714                      | 0.003    | 0.025             |
| CCL19       | 0.49678                                        | 3.5662                       | 0.007    | 0.044             |
| IL18R1      | 0.3364                                         | 6.64045                      | 0.008    | 0.048             |
| LBP         | 0.34828                                        | 4.96949                      | 0.014    | 0.068             |
| CD14        | 0.14460                                        | 7.28775                      | 0.309    | 0.523             |
| CDH5        | 0.06908                                        | 1.67967                      | 0.343    | 0.554             |
| ITIH3       | -0.00439                                       | 2.16440                      | 0.967    | 0.978             |

175  
176 *Differential expression analysis of proteins in survivors and non-survivors 28-days after hospitalization. This*  
177 *analysis was performed on a publicly available proximity-extension assay proteomics-based dataset (data*  
178 *provided by the MGH Emergency Department COVID-19 Cohort (Filbin, Goldberg, Hacohen) with Olink*  
179 *Proteomics: <https://www.olink.com/mgh-covid-study/>). Only proteins that were also quantified in our study;*  
180 *reported in our main findings; and cytokines and interleukins significantly associated with 28-days mortality*  
181 *were analyzed. Statistical analysis was conducted using the EBayes method of the limma package, correcting*  
182 *for age and adjusting for multiple testing using Benjamini and Hochberg's FDR correction.*

183

184 **Supplementary Table 7: Plasma proteins binding to SARS-CoV-2 spike glycoprotein.**

| Gene             | Ctrl average | Spike average | Fold enrichment | P value |
|------------------|--------------|---------------|-----------------|---------|
| <b>SPIKE</b>     | 3.35E+07     | 7.67E+09      | 228.8           | 0.00006 |
| <b>MYH9</b>      | 2.37E+06     | 1.61E+07      | 6.7             | 0.0063  |
| <b>FLNA</b>      | 1.10E+07     | 5.40E+07      | 4.9             | 0.015   |
| <b>C1QA</b>      | 1.85E+07     | 7.78E+07      | 4.2             | 0.007   |
| <b>C1QC</b>      | 4.29E+07     | 1.73E+08      | 4               | 0.004   |
| <b>LGALS3BP</b>  | 1.27E+06     | 4.59E+06      | 3.6             | 0.008   |
| <b>C1QB</b>      | 2.87E+07     | 1.00E+08      | 3.4             | 0.022   |
| <b>LSM4</b>      | 2.46E+06     | 8.50E+06      | 3.4             | 0.015   |
| <b>C4BPB</b>     | 2.27E+07     | 7.05E+07      | 3.1             | 0.022   |
| <b>APOD</b>      | 6.18E+06     | 1.58E+07      | 2.5             | 0.037   |
| <b>ACTB</b>      | 1.23E+08     | 2.86E+08      | 2.3             | 0.037   |
| <b>THAP5</b>     | 1.72E+07     | 3.91E+07      | 2.2             | 0.028   |
| <b>C4BPA</b>     | 3.89E+08     | 8.76E+08      | 2.2             | 0.045   |
| <b>KIF20B</b>    | 7.46E+08     | 1.66E+09      | 2.2             | 0.011   |
| <b>APCS</b>      | 1.03E+07     | 2.17E+07      | 2.1             | 0.022   |
| <b>KIF4B</b>     | 8.84E+09     | 1.75E+10      | 1.9             | 0.03    |
| <b>SELENOP</b>   | 1.00E+09     | 1.89E+09      | 1.8             | 0.02    |
| <b>HIST2H2AC</b> | 5.42E+06     | 1.02E+07      | 1.8             | 0.021   |
| <b>HRG</b>       | 4.48E+10     | 8.18E+10      | 1.8             | 0.038   |
| <b>ZW10</b>      | 7.39E+07     | 1.35E+08      | 1.8             | 0.027   |
| <b>HABP2</b>     | 2.02E+07     | 3.65E+07      | 1.8             | 0.017   |
| <b>CDA</b>       | 2.12E+06     | 3.58E+06      | 1.6             | 0.021   |
| <b>ERP44</b>     | 9.64E+05     | 1.48E+06      | 1.5             | 0.035   |
| <b>CPN1</b>      | 3.04E+07     | 4.39E+07      | 1.4             | 0.024   |

185  
186 *List of the 24 non-immunoglobulin proteins detected at significantly higher levels by LC-MS/MS in pull-downs*  
187 *of His-tagged SARS-CoV-2 spike glycoprotein mixed with COVID-19 plasma. Control experiments were*  
188 *conducted to exclude: 1) co-isolates binding to the solid phase of the His-tagged pull-down metal affinity*  
189 *beads; 2) proteins present in the His-tagged SARS-CoV-2 preparation prior to mixing with plasma (i.e.*  
190 *carryover from HEK293 cells used for production of the recombinant Spike glycoprotein).*

191

192

**Supplementary Table 8: Comparison of plasma protein binding to SARS-CoV-2 spike glycoprotein in patients with and without COVID-19.**

| Gene            | Non-COVID-19<br>average | COVID-19<br>average | Fold<br>enrichment | P value |
|-----------------|-------------------------|---------------------|--------------------|---------|
| <b>LGALS3BP</b> | 1.23E+06                | 4.59E+06            | 3.7                | 0.0025  |
| <b>APOD</b>     | 4.95E+06                | 1.58E+07            | 3.1                | 0.0036  |

Listed are the two non-immunoglobulin proteins detected at significantly higher levels by LC-MS/MS in pull-down samples of His-tagged spike glycoprotein mixed with plasma from COVID-19 compared to non-COVID-19 ICU patients.

**Supplementary Table 9: Machine learning signatures using the SVM RBF model.**

| Single Signature                | Accuracy | NPV    | Specificity | PPV (A) | Sensitivity (B) | ROC AUC (C) | Average of A+B+C |
|---------------------------------|----------|--------|-------------|---------|-----------------|-------------|------------------|
| RNAemia                         | 79.49%   | 86.67% | 86.67%      | 55.56%  | 55.56%          | 85.37%      | 65.49%           |
| Age                             | 73.08%   | 86.79% | 76.67%      | 44.00%  | 61.11%          | 71.11%      | 58.74%           |
| PTX3                            | 78.21%   | 82.09% | 91.67%      | 54.55%  | 33.33%          | 69.35%      | 52.41%           |
| Urea                            | 65.38%   | 78.95% | 75.00%      | 28.57%  | 33.33%          | 54.63%      | 38.84%           |
| Binary Signature                | Accuracy | NPV    | Specificity | PPV (A) | Sensitivity (B) | ROC AUC (C) | Average of A+B+C |
| Age, PTX3                       | 87.18%   | 90.32% | 93.33%      | 75.00%  | 66.67%          | 78.52%      | 73.40%           |
| Age, RNAemia                    | 83.33%   | 91.23% | 86.67%      | 61.90%  | 72.22%          | 79.81%      | 71.31%           |
| Age, FiO <sub>2</sub>           | 76.92%   | 90.38% | 78.33%      | 50.00%  | 72.22%          | 78.70%      | 66.98%           |
| Age, Albumin                    | 82.05%   | 89.66% | 86.67%      | 60.00%  | 66.67%          | 74.07%      | 66.91%           |
| Age, ALT                        | 82.05%   | 89.66% | 86.67%      | 60.00%  | 66.67%          | 72.41%      | 66.36%           |
| Age, Respiratory rate           | 80.77%   | 89.47% | 85.00%      | 57.14%  | 66.67%          | 74.72%      | 66.18%           |
| COPD, RNAemia                   | 79.49%   | 86.67% | 86.67%      | 55.56%  | 55.56%          | 86.39%      | 65.83%           |
| Diabetes, RNAemia               | 79.49%   | 86.67% | 86.67%      | 55.56%  | 55.56%          | 86.30%      | 65.80%           |
| pH, RNAemia                     | 73.08%   | 91.49% | 71.67%      | 45.16%  | 77.78%          | 69.91%      | 65.30%           |
| Hypertension, RNAemia           | 79.49%   | 86.67% | 86.67%      | 55.56%  | 55.56%          | 82.13%      | 64.41%           |
| Triplet Signature               | Accuracy | NPV    | Specificity | PPV (A) | Sensitivity (B) | ROC AUC (C) | Average of A+B+C |
| Age, FiO <sub>2</sub> , RNAemia | 84.62%   | 91.38% | 88.33%      | 65.00%  | 72.22%          | 85.93%      | 74.38%           |
| Age, RNAemia, PTX3              | 80.77%   | 90.91% | 83.33%      | 56.52%  | 72.22%          | 82.59%      | 70.45%           |
| Age, HR, Diabetes               | 87.18%   | 89.06% | 95.00%      | 78.57%  | 61.11%          | 76.67%      | 72.12%           |
| Age, FiO <sub>2</sub> , PTX3    | 83.33%   | 91.23% | 86.67%      | 61.90%  | 72.22%          | 81.85%      | 71.99%           |
| Age, Sodium, PTX3               | 87.18%   | 87.88% | 96.67%      | 83.33%  | 55.56%          | 76.20%      | 71.70%           |
| Age, Lymphocytes, RNAemia       | 84.62%   | 90.00% | 90.00%      | 66.67%  | 66.67%          | 81.20%      | 71.51%           |
| Age, CRP, RNAemia               | 83.33%   | 91.23% | 86.67%      | 61.90%  | 72.22%          | 78.98%      | 71.04%           |
| Age, HR, PTX3                   | 85.90%   | 87.69% | 95.00%      | 76.92%  | 55.56%          | 80.65%      | 71.04%           |
| Age, pH, RNAemia                | 82.05%   | 91.07% | 85.00%      | 59.09%  | 72.22%          | 81.67%      | 70.99%           |
| Age, Bilirubin, Hb              | 83.33%   | 91.23% | 86.67%      | 61.90%  | 72.22%          | 78.06%      | 70.73%           |

Single markers were filtered for prediction model based on statistical significance ( $P$  value  $<0.05$ ). The top 10 combinations were selected from 114 binary and 885 triplet combinations based on average score i.e. average of PPV, Sensitivity and ROC. Signatures are shown in descending order based on average score and using leave-one-out validation. Note that PTX3 levels are different in serum and plasma. The best triplet signature 'Age, FiO<sub>2</sub>, RNAemia' provides nominal gain in prediction probability as reflected in PPV with no uplift to specificity when compared to 'Age, RNAemia' suggesting the binary combination to be an optimal signature to choose. Abbreviations: NPV: negative predictive value; PPV: positive predicted value; Temp: body temperature; Hb: Hemoglobin, HR: Heart rate.

**Supplementary Table 10: Isolation windows used in DIA-MS methods.**

| Precursor ion [m/z]                              | Isolation Window [m/z] |
|--------------------------------------------------|------------------------|
| 360.5                                            | 61                     |
| 405.5                                            | 31                     |
| 431, 452, 473                                    | 22                     |
| 492, 509, 526, 543, 560, 577, 594, 611, 628, 645 | 18                     |
| 664, 685, 706, 727                               | 22                     |
| 752, 781, 810, 839                               | 30                     |
| 871                                              | 36                     |
| 908, 947                                         | 40                     |
| 991, 1040                                        | 50                     |
| 1095                                             | 62                     |
| 1162.5                                           | 75                     |

**Supplementary Table 11: Features with missing data in the combined COVID-19 ICU cohorts.**

| Feature                        | Missing Count | Missing % | Imputed |
|--------------------------------|---------------|-----------|---------|
| Creatinine                     | 1             | 1.3%      | Yes     |
| C-reactive protein             | 2             | 2.6%      | Yes     |
| Albumin                        | 3             | 3.8%      | Yes     |
| Bilirubin                      | 4             | 5.1%      | Yes     |
| Lymphocytes                    | 3             | 3.8%      | Yes     |
| Monocytes                      | 3             | 3.8%      | Yes     |
| Hemoglobin                     | 3             | 3.8%      | Yes     |
| ALP (alkaline phosphatase)     | 3             | 3.8%      | Yes     |
| Respiratory rate               | 5             | 6.4%      | Yes     |
| White cell count               | 5             | 6.4%      | Yes     |
| Neutrophil                     | 5             | 6.4%      | Yes     |
| SOFA score                     | 7             | 9.0%      | Yes     |
| Urea                           | 9             | 11.5%     | Yes     |
| ALT (alanine aminotransferase) | 16            | 20.5%     | Yes     |

List of features with missing data in the combined cohort i.e. GSTT and KCH cohort. Features with missing percentage less than 30% were imputed using KNN impute with  $K=5$ . Eosinophil counts and basophil counts with missing percentage greater than 30% were not imputed and excluded from data analysis.
